# Supplementary material for: A Mixture of Valine and Isoleucine Restores the Growth of Protein-Restricted Pigs Likely through Improved Gut Development, Hepatic IGF-1 Pathway, and Plasma Metabolomic Profile
Source: MDPI journal article supplement (doi:10.3390/ijms23063300), 2022-03-18
Supplement: s1 [file s1]

## Supplementary Material

### Supplementary Tables

**Table S1.** Weekly growth measurements of nursery pigs fed with very low protein diets supplemented with Ile, Val, or combination of both

|                       | Diets <sup>1</sup>  |                     |                     |                     |                         | SEM <sup>2</sup> | P-value |
|-----------------------|---------------------|---------------------|---------------------|---------------------|-------------------------|------------------|---------|
|                       | PC                  | LP                  | LPV                 | LPI                 | LPVI                    |                  |         |
| BWG <sup>1</sup> , kg |                     |                     |                     |                     |                         |                  |         |
| Wk 1                  | 2.00 <sup>a</sup>   | 1.14 <sup>bc</sup>  | 1.84 <sup>abψ</sup> | 0.94 <sup>c</sup>   | 1.80 <sup>ab</sup>      | 0.10             | < 0.01  |
| Wk 2                  | 2.86 <sup>a</sup>   | 1.97 <sup>ab§</sup> | 2.46 <sup>a</sup>   | 1.26 <sup>b</sup>   | 2.38 <sup>a</sup>       | 0.13             | < 0.01  |
| Wk 3                  | 3.46 <sup>a</sup>   | 1.73 <sup>bc</sup>  | 1.80 <sup>bc</sup>  | 1.21 <sup>c</sup>   | 2.51 <sup>ab#</sup>     | 0.17             | < 0.01  |
| Wk 4                  | 4.16 <sup>a</sup>   | 2.14 <sup>cd</sup>  | 3.33 <sup>ab</sup>  | 1.47 <sup>d</sup>   | 3.16 <sup>abc</sup>     | 0.19             | < 0.01  |
| Wk 5                  | 4.50 <sup>a</sup>   | 2.72 <sup>b</sup>   | 3.46 <sup>ab</sup>  | 2.31 <sup>b</sup>   | 4.21 <sup>a</sup>       | 0.19             | < 0.01  |
| MFI <sup>1</sup> , kg |                     |                     |                     |                     |                         |                  |         |
| Wk 1                  | 0.33 <sup>ab</sup>  | 0.33 <sup>ab</sup>  | 0.37 <sup>a</sup>   | 0.26 <sup>b</sup>   | 0.40 <sup>a</sup>       | 0.01             | < 0.01  |
| Wk 2                  | 0.56 <sup>abc</sup> | 0.46 <sup>bc</sup>  | 0.59 <sup>ab</sup>  | 0.41 <sup>c¥</sup>  | 0.65 <sup>a</sup>       | 0.02             | < 0.01  |
| Wk 3                  | 0.75 <sup>ab</sup>  | 0.60 <sup>bc</sup>  | 0.65 <sup>ab</sup>  | 0.45 <sup>c</sup>   | 0.79 <sup>ab&amp;</sup> | 0.03             | < 0.01  |
| Wk 4                  | 0.95 <sup>a</sup>   | 0.73 <sup>bc</sup>  | 0.82 <sup>ab</sup>  | 0.54 <sup>c\$</sup> | 0.91 <sup>ab&amp;</sup> | 0.03             | < 0.01  |
| Wk 5                  | 1.12 <sup>a</sup>   | 0.81 <sup>bc</sup>  | 0.97 <sup>ab</sup>  | 0.63 <sup>c</sup>   | 1.18 <sup>a</sup>       | 0.04             | < 0.01  |
| CFI <sup>1</sup> , kg |                     |                     |                     |                     |                         |                  |         |
| Wk1                   | 2.27 <sup>ab</sup>  | 2.31 <sup>ab</sup>  | 2.59 <sup>a</sup>   | 1.84 <sup>b</sup>   | 2.78 <sup>a</sup>       | 0.09             | < 0.01  |

|                                |                     |                               |                     |                     |                         |      |        |
|--------------------------------|---------------------|-------------------------------|---------------------|---------------------|-------------------------|------|--------|
| Wk 2                           | 3.91 <sup>abc</sup> | 3.20 <sup>bc</sup>            | 4.12 <sup>ab</sup>  | 2.86 <sup>c¥</sup>  | 4.55 <sup>a</sup>       | 0.15 | < 0.01 |
| Wk 3                           | 5.28 <sup>ab</sup>  | 4.19 <sup>abc</sup>           | 4.53 <sup>ab</sup>  | 3.11 <sup>c</sup>   | 5.52 <sup>a&amp;</sup>  | 0.20 | < 0.01 |
| Wk 4                           | 6.68 <sup>a</sup>   | 5.09 <sup>bc</sup>            | 5.74 <sup>ab</sup>  | 3.81 <sup>c\$</sup> | 6.38 <sup>ab&amp;</sup> | 0.22 | < 0.01 |
| Wk 5                           | 7.84 <sup>a</sup>   | 5.69 <sup>bc</sup>            | 6.79 <sup>ab</sup>  | 4.42 <sup>c</sup>   | 8.25 <sup>a</sup>       | 0.32 | < 0.01 |
| <b>CPI <sup>1</sup>, kg</b>    |                     |                               |                     |                     |                         |      |        |
| Wk 1                           | 0.43 <sup>a</sup>   | 0.30 <sup>bc</sup>            | 0.35 <sup>ab</sup>  | 0.24 <sup>c</sup>   | 0.41 <sup>a</sup>       | 0.02 | < 0.01 |
| Wk 2                           | 0.73 <sup>a</sup>   | 0.44 <sup>b<sup>c</sup></sup> | 0.59 <sup>ab</sup>  | 0.39 <sup>c</sup>   | 0.63 <sup>a</sup>       | 0.03 | < 0.01 |
| Wk 3                           | 0.99 <sup>a</sup>   | 0.49 <sup>bc</sup>            | 0.59 <sup>bc</sup>  | 0.40 <sup>c†</sup>  | 0.69 <sup>b&amp;</sup>  | 0.04 | < 0.01 |
| Wk 4                           | 1.25 <sup>a</sup>   | 0.62 <sup>bc</sup>            | 0.75 <sup>b</sup>   | 0.49 <sup>c</sup>   | 0.80 <sup>b&amp;</sup>  | 0.05 | < 0.01 |
| Wk 5                           | 1.47 <sup>a</sup>   | 0.69 <sup>cd</sup>            | 0.88 <sup>bc</sup>  | 0.57 <sup>d</sup>   | 1.04 <sup>b</sup>       | 0.06 | < 0.01 |
| <b>G:F <sup>1</sup>, kg/kg</b> |                     |                               |                     |                     |                         |      |        |
| Wk 1                           | 0.92 <sup>a</sup>   | 0.53 <sup>b</sup>             | 0.70 <sup>ab</sup>  | 0.58 <sup>b</sup>   | 0.66 <sup>b</sup>       | 0.03 | < 0.01 |
| Wk 2                           | 0.79 <sup>a</sup>   | 0.58 <sup>ab\$</sup>          | 0.59 <sup>ab*</sup> | 0.45 <sup>b</sup>   | 0.53 <sup>b</sup>       | 0.03 | < 0.01 |
| Wk 3                           | 0.81                | 0.54                          | 0.41 <sup>*</sup>   | 0.37 <sup>¥</sup>   | 0.46                    | 0.05 | 0.04   |
| Wk 4                           | 0.71 <sup>a</sup>   | 0.41 <sup>b</sup>             | 0.57 <sup>ab</sup>  | 0.38 <sup>b</sup>   | 0.49 <sup>b</sup>       | 0.03 | < 0.01 |
| Wk 5                           | 0.67                | 0.55                          | 0.51                | 0.50                | 0.51                    | 0.03 | 0.52   |
| <b>G:P <sup>1</sup>, kg/kg</b> |                     |                               |                     |                     |                         |      |        |
| Wk 1                           | 4.94                | 4.03                          | 4.91                | 4.17                | 4.70                    | 0.20 | 0.51   |
| Wk 2                           | 3.86                | 3.93                          | 4.15                | 3.27                | 3.74                    | 0.15 | 0.35   |
| Wk 3                           | 3.67                | 3.07                          | 3.15                | 2.89                | 3.60                    | 0.13 | 0.24   |
| Wk 4                           | 3.29 <sup>b</sup>   | 3.14 <sup>b</sup>             | 4.40 <sup>a</sup>   | 2.97 <sup>b</sup>   | 3.90 <sup>ab@</sup>     | 0.13 | < 0.01 |
| Wk 5                           | 3.09 <sup>b</sup>   | 3.37 <sup>ab</sup>            | 3.73 <sup>ab</sup>  | 3.91 <sup>ab¥</sup> | 4.08 <sup>a</sup>       | 0.11 | 0.01   |

<sup>1</sup>PC (positive control), standard protein diet; LP (negative control), low protein diet containing limiting amino acids (i.e., Lys, Met, Thr and Trp) at NRC (2012) levels; LPV, LP containing Val at NRC level; LPI: LP containing Ile at NRC level; LPVI: LP containing Val and Ile at NRC levels. BWG: body weight gain; MFI: mean feed intake; CFI: cumulative feed intake; CPI: cumulative protein intake; G:F: gain:feed ratio; G:P: gain:protein ratio. The values are means,  $n=8$ . The  $P$ -values for the overall model effect for diet, week (wk) and diet  $\times$  wk for BWG, MFI, CFI and CPI were  $< 0.01$ ,  $< 0.01$  and  $< 0.01$ , for G:F were  $< 0.01$ , 0.02 and 0.19 and for G:P were  $< 0.01$ ,  $< 0.01$  and 0.32, respectively.

<sup>2</sup>SEM: standard error of the mean.

<sup>a,b,c,d</sup> Within each row, the values with different superscript letter(s) are different ( $P \leq 0.05$ ). <sup>§</sup>  $P \leq 0.1$  LP vs. PC, <sup>\*</sup>  $P \leq 0.1$  LPV vs. PC, <sup>¥</sup>  $P \leq 0.1$  LPI vs. PC, <sup>#</sup>  $P \leq 0.1$  LPVI vs. PC, <sup>ψ</sup>  $P \leq 0.1$  LPV vs. LP, <sup>\$</sup>  $P \leq 0.1$  LPI vs. LP, <sup>&</sup>  $P \leq 0.1$  LPVI vs. LP, <sup>‡</sup>  $P \leq 0.1$  LPI vs. LPV, <sup>@</sup>  $P \leq 0.1$  LPVI vs. LPI.

**Table S2.** Non-significant plasma metabolites in nursery pigs fed with very low protein diets supplemented with Ile, Val, or combination of both.

| Metabolites         | Diets <sup>1</sup> |         |         |         |         | SEM <sup>2</sup> | P-value |
|---------------------|--------------------|---------|---------|---------|---------|------------------|---------|
|                     | PC                 | LP      | LPV     | LPI     | LPVI    |                  |         |
| Pelargonic acid     | 16743              | 16562   | 16456   | 16527   | 16528   | 82               | 0.86    |
| Phenylacetic acid   | 4037               | 3473    | 3340    | 3865    | 2898    | 175              | 0.26    |
| Phenylethylamine    | 1759               | 1742    | 1685    | 1744    | 1769    | 34               | 0.95    |
| Phosphate           | 486833             | 449282  | 388919  | 357830  | 404195  | 18840            | 0.21    |
| Phosphoethanolamine | 10374              | 9787    | 10056   | 9985    | 9970    | 93               | 0.42    |
| Phytosphingosine    | 1272               | 901     | 1220    | 999     | 1391    | 69               | 0.14    |
| Pipecolinic acid    | 17218              | 19063   | 18679   | 19960   | 19468   | 431              | 0.32    |
| Proline             | 1106940            | 1189833 | 1139922 | 1170529 | 1144801 | 10379            | 0.10    |
| Pseudo uridine      | 24544              | 24294   | 24579   | 24397   | 24786   | 174              | 0.93    |
| Putrescine          | 5063               | 4855    | 5101    | 4792    | 4719    | 183              | 0.96    |
| Ribitol             | 4322               | 4052    | 5404    | 4103    | 4317    | 257              | 0.47    |

|                        |        |        |        |        |        |       |      |
|------------------------|--------|--------|--------|--------|--------|-------|------|
| Ribonic acid           | 65535  | 46953  | 61598  | 48444  | 47370  | 3414  | 0.25 |
| Ribose                 | 19431  | 14923  | 14612  | 16988  | 16650  | 985   | 0.57 |
| Salicylic acid         | 1885   | 1924   | 1955   | 1949   | 2106   | 29    | 0.19 |
| Sophorose              | 807    | 982    | 1055   | 956    | 1172   | 71    | 0.60 |
| Stearic acid           | 761930 | 756035 | 749177 | 738208 | 761551 | 4805  | 0.51 |
| Succinic acid          | 81651  | 81010  | 77006  | 79173  | 77448  | 1052  | 0.57 |
| Taurine                | 5989   | 6991   | 7181   | 6909   | 6420   | 247   | 0.56 |
| Threitol               | 7104   | 7317   | 7123   | 7168   | 7264   | 46    | 0.55 |
| Thymidine              | 3513   | 3472   | 3485   | 3549   | 3514   | 27    | 0.91 |
| Thymine                | 2023   | 1795   | 1675   | 2008   | 1954   | 94    | 0.74 |
| Trans 4 hydroxyproline | 395255 | 346104 | 368271 | 384076 | 401834 | 10245 | 0.45 |
| Tryptophan             | 237901 | 315808 | 326614 | 278326 | 307687 | 11671 | 0.10 |
| UDP glucuronic acid    | 1689   | 1568   | 1604   | 1554   | 1521   | 46    | 0.83 |
| Uric acid              | 1870   | 1809   | 1800   | 1822   | 1754   | 20    | 0.48 |
| Uridine                | 2064   | 1908   | 2012   | 1982   | 2000   | 27    | 0.51 |

|                            |        |        |        |        |        |      |      |
|----------------------------|--------|--------|--------|--------|--------|------|------|
| Xanthine                   | 1279   | 1177   | 1225   | 1160   | 1205   | 17   | 0.19 |
| Xylose                     | 17373  | 17737  | 17038  | 17505  | 17034  | 107  | 0.17 |
| 1,5-anhydroglucitol        | 129894 | 129333 | 123970 | 115899 | 157050 | 6577 | 0.36 |
| 1-methylhydantoin          | 11388  | 12221  | 11148  | 11706  | 11762  | 140  | 0.15 |
| 2-hydroxybutanoic acid     | 53352  | 53578  | 53172  | 54825  | 53087  | 397  | 0.64 |
| 2-picolinic acid           | 684    | 675    | 710    | 692    | 691    | 10   | 0.90 |
| 3,4-dihydroxycinnamic acid | 655    | 657    | 670    | 651    | 666    | 6    | 0.86 |
| 4-hydroxyhippuric acid     | 413    | 388    | 409    | 421    | 374    | 20   | 0.95 |
| 4-hydroxyphenylacetic acid | 1003   | 1001   | 972    | 1027   | 1038   | 11   | 0.38 |
| 5-methoxytryptamine        | 1096   | 1051   | 1119   | 1176   | 982    | 44   | 0.72 |
| Aconitic acid              | 2565   | 2526   | 2459   | 2437   | 2486   | 20   | 0.28 |
| Adenine                    | 1280   | 1232   | 1238   | 1191   | 1228   | 11   | 0.18 |
| Adenosine-5-monophosphate  | 551    | 553    | 602    | 564    | 568    | 15   | 0.87 |
| Adipic acid                | 3913   | 3895   | 3842   | 3829   | 3917   | 31   | 0.86 |
| Allantoic acid             | 27984  | 26824  | 27034  | 27356  | 27816  | 226  | 0.44 |
| Anthranilic acid           | 823    | 790    | 824    | 788    | 837    | 8    | 0.13 |

|                            |        |        |        |        |        |       |      |
|----------------------------|--------|--------|--------|--------|--------|-------|------|
| Arachidic acid             | 5117   | 4868   | 4917   | 4765   | 5007   | 49    | 0.18 |
| Arachidonic acid           | 19440  | 22939  | 25626  | 23166  | 25521  | 1409  | 0.65 |
| Asparagine                 | 37597  | 37527  | 36851  | 36811  | 36360  | 206   | 0.28 |
| Aspartic acid              | 54981  | 53509  | 55281  | 52802  | 55484  | 386   | 0.11 |
| $\beta$ -glycerolphosphate | 3606   | 5486   | 3886   | 4154   | 4830   | 255   | 0.12 |
| $\beta$ -mannosylglycerate | 2674   | 2753   | 3507   | 2682   | 4203   | 263   | 0.25 |
| $\beta$ -sitosterol        | 1545   | 1591   | 1610   | 1534   | 1591   | 16    | 0.54 |
| Biphenyl                   | 1746   | 1903   | 1895   | 1882   | 1883   | 25    | 0.22 |
| Cadaverine                 | 2908   | 2806   | 2834   | 2822   | 2906   | 20    | 0.31 |
| Capric acid                | 3480   | 3426   | 3725   | 3213   | 3663   | 116   | 0.68 |
| Caprylic acid              | 11837  | 11373  | 11608  | 11575  | 11600  | 67    | 0.34 |
| Cerotinic acid             | 789    | 784    | 758    | 751    | 792    | 8     | 0.39 |
| Chenodeoxycholic acid      | 5622   | 5490   | 5520   | 5605   | 5575   | 70    | 0.98 |
| Cholesterol                | 298448 | 314443 | 299453 | 308406 | 357306 | 11180 | 0.46 |
| Citric acid                | 354835 | 340240 | 345232 | 337763 | 344527 | 2296  | 0.16 |

|                          |        |        |        |        |        |      |      |
|--------------------------|--------|--------|--------|--------|--------|------|------|
| Citrulline               | 45150  | 35027  | 36322  | 35637  | 38642  | 1557 | 0.23 |
| Cyano-L-Alanine          | 2440   | 3124   | 2851   | 2941   | 2661   | 143  | 0.63 |
| Cysteine                 | 4245   | 4401   | 4401   | 4590   | 4435   | 50   | 0.30 |
| Cytosine                 | 1307   | 1275   | 1285   | 1248   | 1276   | 7    | 0.17 |
| Dihydroxymalonic acid    | 578    | 453    | 678    | 579    | 513    | 41   | 0.52 |
| Dimethylglycine          | 1476   | 3409   | 2662   | 3040   | 2699   | 238  | 0.11 |
| Docosahexaenoic acid     | 3991   | 4166   | 3942   | 4096   | 4131   | 41   | 0.37 |
| Erythritol               | 34556  | 35338  | 34825  | 34720  | 35472  | 185  | 0.45 |
| Erythrose                | 973    | 971    | 979    | 994    | 993    | 9    | 0.89 |
| Fumaric acid             | 10438  | 10307  | 9893   | 10204  | 9689   | 107  | 0.16 |
| Galactinol               | 602    | 571    | 609    | 581    | 574    | 6    | 0.11 |
| Glucose-6-phosphate      | 7738   | 7002   | 7095   | 6734   | 7193   | 127  | 0.14 |
| Glucuronic acid          | 17927  | 16804  | 17400  | 17545  | 17245  | 144  | 0.18 |
| Glycerol                 | 212290 | 202758 | 201154 | 195734 | 197990 | 2334 | 0.23 |
| Glycerol-alpha-phosphate | 49416  | 44721  | 42679  | 47746  | 41094  | 1961 | 0.67 |
| Glycyl tyrosine          | 775    | 840    | 803    | 771    | 761    | 12   | 0.26 |



|                          |         |         |         |         |         |        |      |
|--------------------------|---------|---------|---------|---------|---------|--------|------|
| Guanidinosuccinate       | 1405    | 1251    | 1542    | 1273    | 1351    | 56     | 0.51 |
| Guanosine                | 2485    | 2212    | 2312    | 2251    | 2341    | 41     | 0.25 |
| Heptadecanoic acid       | 53327   | 68765   | 60100   | 63311   | 59173   | 2930   | 0.58 |
| Hypoxanthine             | 148884  | 126372  | 133377  | 107891  | 135201  | 7549   | 0.55 |
| Indol-3-propionic acid   | 8692    | 8757    | 8179    | 8654    | 8530    | 121    | 0.59 |
| Indol-3-lactate          | 9037    | 8659    | 8608    | 8578    | 8746    | 79     | 0.35 |
| Inosine-5-monophosphate  | 438     | 417     | 419     | 414     | 413     | 4      | 0.38 |
| Inosine                  | 23355   | 21557   | 22204   | 20772   | 21827   | 458    | 0.49 |
| Inositol-4-monophosphate | 947     | 956     | 848     | 947     | 933     | 62     | 0.98 |
| Isocitric acid           | 7145    | 6913    | 6997    | 6853    | 6977    | 44     | 0.28 |
| Isomaltose               | 2040    | 2100    | 2044    | 2113    | 2088    | 27     | 0.89 |
| Isothreonic acid         | 73413   | 60222   | 72687   | 57376   | 62540   | 2616   | 0.17 |
| Lactamide                | 4145    | 3983    | 3979    | 3916    | 3860    | 34     | 0.11 |
| Lactic acid              | 3970671 | 4107989 | 3609044 | 3161065 | 3348051 | 198315 | 0.53 |
| Lactose                  | 1719    | 1643    | 1650    | 1576    | 1646    | 19     | 0.24 |

|                        |        |        |        |        |        |      |      |
|------------------------|--------|--------|--------|--------|--------|------|------|
| Linoleic acid          | 6862   | 8027   | 6254   | 8551   | 6499   | 409  | 0.32 |
| Maleimide              | 4419   | 4391   | 4215   | 4623   | 4367   | 132  | 0.92 |
| Maltitol               | 443    | 428    | 437    | 416    | 429    | 6    | 0.67 |
| Methanolphosphate      | 4194   | 5239   | 4913   | 5914   | 5918   | 253  | 0.15 |
| Myo-inositol           | 354815 | 356919 | 344019 | 355843 | 353453 | 3378 | 0.77 |
| Myristic acid          | 4818   | 3891   | 3936   | 3691   | 3534   | 172  | 0.15 |
| N-acetyl-aspartic acid | 1883   | 1862   | 1785   | 1862   | 1847   | 31   | 0.91 |
| N-acetylglycine        | 1620   | 1430   | 1614   | 1780   | 1755   | 93   | 0.79 |
| N-acetylmannosamine    | 2112   | 1915   | 2076   | 1846   | 2333   | 111  | 0.69 |
| Nicotinic acid         | 858    | 855    | 846    | 832    | 833    | 7    | 0.66 |
| Oleic acid             | 9377   | 9699   | 7660   | 9195   | 7729   | 632  | 0.78 |
| Oxalic acid            | 3132   | 3201   | 3196   | 3176   | 3157   | 42   | 0.99 |
| Palmitic acid          | 161805 | 143024 | 135382 | 128512 | 143851 | 5356 | 0.37 |
| Palmitoleic acid       | 689    | 674    | 684    | 682    | 693    | 6    | 0.89 |
| Pantothenic acid       | 863    | 672    | 762    | 704    | 863    | 46   | 0.59 |

---

<sup>1</sup>PC (positive control), standard protein diet; LP (negative control), low protein diet containing limiting amino acids (i.e., Lys, Met, Thr and Trp) at NRC (2012) levels; LPV, LP containing Val at NRC level; LPI: LP containing Ile at NRC level; LPVI: LP containing Val and Ile at NRC levels. The values are mean peak heights,  $n=8$ .

<sup>2</sup>SEM: standard error of the mean.

**Table S3.** The sequences [forward (F) and revers (R)], location on template, amplicon size (bp), and GenBank accession numbers for primers used for reverse transcription quantitative real-time polymerase chain reaction (RT-qPCR)

| Genes <sup>1</sup> | Sequence (5' → 3')        | Location on template | Amplicon length (bp) | GenBank accession no. |
|--------------------|---------------------------|----------------------|----------------------|-----------------------|
| <i>MUC1</i>        | F: GTGCCGCTGCCCACAACCTG   | 333-352              | 141                  | XM_021089730.1        |
|                    | R: AGCCGGGTACCCAGACCCA    | 454-473              |                      |                       |
| <i>MUC2</i>        | F: GGTCATGCTGGAGCTGGACAGT | 483-504              | 181                  | XM_021082584.1        |
|                    | R: TGCCTCCTCGGGGTCGTCAC   | 644-663              |                      |                       |
| <i>EGFR</i>        | F: GCCTTAGCCGTCTTATCCAA   | 478-497              | 299                  | NM_214007.1           |
|                    | R: TGGGCACAGATGACTTTGGT   | 757-776              |                      |                       |
| <i>IGF-1R</i>      | F: TTCGCCAGATCCTAGGGGAG   | 1242-1261            | 120                  | NM_214172.1           |
|                    | R: TCCCAGCTTTGATGGTCAGG   | 1342-1361            |                      |                       |
| <i>Caspase-9</i>   | F: AATGCCGATTGGCTTACGT    | 606-625              | 195                  | XM_013998997.2        |
|                    | R: CATTTGCTTGGCAGTCAGGTT  | 780-800              |                      |                       |
| <i>Ki-67</i>       | F: TCTTGTCCTGAATCCGCAA    | 86-105               | 88                   | NM_001101827.1        |
|                    | R: TGTTTCTCTGGTTGCTTGTTG  | 152-173              |                      |                       |

|                                |                                    |           |     |                |
|--------------------------------|------------------------------------|-----------|-----|----------------|
| <i>PPAR<math>\gamma</math></i> | <b>F:</b> AGGACTACCAAAGTGCCATCAAA  | 312-334   | 142 | NM_214379.1    |
|                                | <b>R:</b> GAGGCTTTATCCCCACAGACAC   | 432-453   |     |                |
| <i>IGF-1</i>                   | <b>F:</b> CACAGACGGGCATCGTGGAT     | 383-402   | 90  | XM_021091138.1 |
|                                | <b>R:</b> ACTTGGCAGGCTTGAGGGGT     | 453-472   |     |                |
| <i>IGFBP1</i>                  | <b>F:</b> CCCATCCTTTGGAACGCCATCAAT | 467-490   | 121 | NM_001195105.1 |
|                                | <b>R:</b> TGGCTAGTCTGTCCAGCACTTTGT | 564-587   |     |                |
| <i>mTOR</i>                    | <b>F:</b> GGGGTTTGGATCAGGGTCTG     | 2504-2523 | 80  | XM_003127584.6 |
|                                | <b>R:</b> GACTCATCCGCCCTACATG      | 2444-2463 |     |                |
| <i>GCN2</i>                    | <b>F:</b> GAAATGCTGGAAAGGCAGGC     | 526-545   | 77  | XM_021097873.1 |
|                                | <b>R:</b> CGTTGCTCCTGCTCCTCTTT     | 583-602   |     |                |
| <i>ATF4</i>                    | <b>F:</b> GGGCTGAAGAGAGCTTAGGG     | 1068-1087 | 69  | XM_021090887.1 |
|                                | <b>R:</b> ACCCATGAGGTTTGAAGTGC     | 1117-1136 |     |                |
| <i>CSNK2A1</i>                 | <b>F:</b> TTTACCTCCAGCTGCCTCTT     | 191-210   | 151 | XM_003134359.5 |
|                                | <b>R:</b> AGTACTCTCGGGGTCTGTGC     | 322-341   |     |                |
| <i>PRKCA</i>                   | <b>F:</b> GAAGGGCAGTTTCGGGAAGG     | 1038-1057 | 156 | XM_021066740.1 |
|                                | <b>R:</b> GGAGGCTTATCCAACAGGGC     | 1174-1193 |     |                |

|                |                                    |           |     |                |
|----------------|------------------------------------|-----------|-----|----------------|
| <i>OCN</i>     | <b>F:</b> TCCTGGGTGTGATGGTGTTTC    | 633-652   | 144 | NM_001163647.2 |
|                | <b>R:</b> CGTAGAGTCCAGTCACCGCA     | 757-776   |     |                |
| <i>ZO1</i>     | <b>F:</b> AAGCCCTAAGTTCAATCACAATCT | 4981-5004 | 130 | XM_021098827.1 |
|                | <b>R:</b> ATCAAATCAGGAGGCGGC       | 5092-5110 |     |                |
| <i>β-Actin</i> | <b>F:</b> CTGCGGCATCCACGAAACT      | 944-962   | 147 | XM_021086047.1 |
|                | <b>R:</b> AGGGCCGTGATCTCCTTCTG     | 1071-1090 |     |                |

---

<sup>1</sup> *MUC1*, mucin 1; *MUC2*, mucin 2; *EGFR*, epidermal growth factor receptor; *IGF-1R*, insulin-like growth factor 1 receptor; *Ki-67*; *PPAR<sub>γ</sub>*, peroxisome proliferator activated receptor gamma; *IGF-1*, insulin-like growth factor 1; *IGFBP1*, insulin-like growth factor binding protein 1; *mTOR*, mechanistic target of rapamycin; *GCN2*, general control nonderepressible 2; *ATF4*, activating transcription factor 4; *CSNK2A1*, casein kinase 2 alpha 1; *PRKCA*, protein kinase C alpha; *OCN*, occludin; *ZO1*, zonula occludens 1.

Supplementary Figures

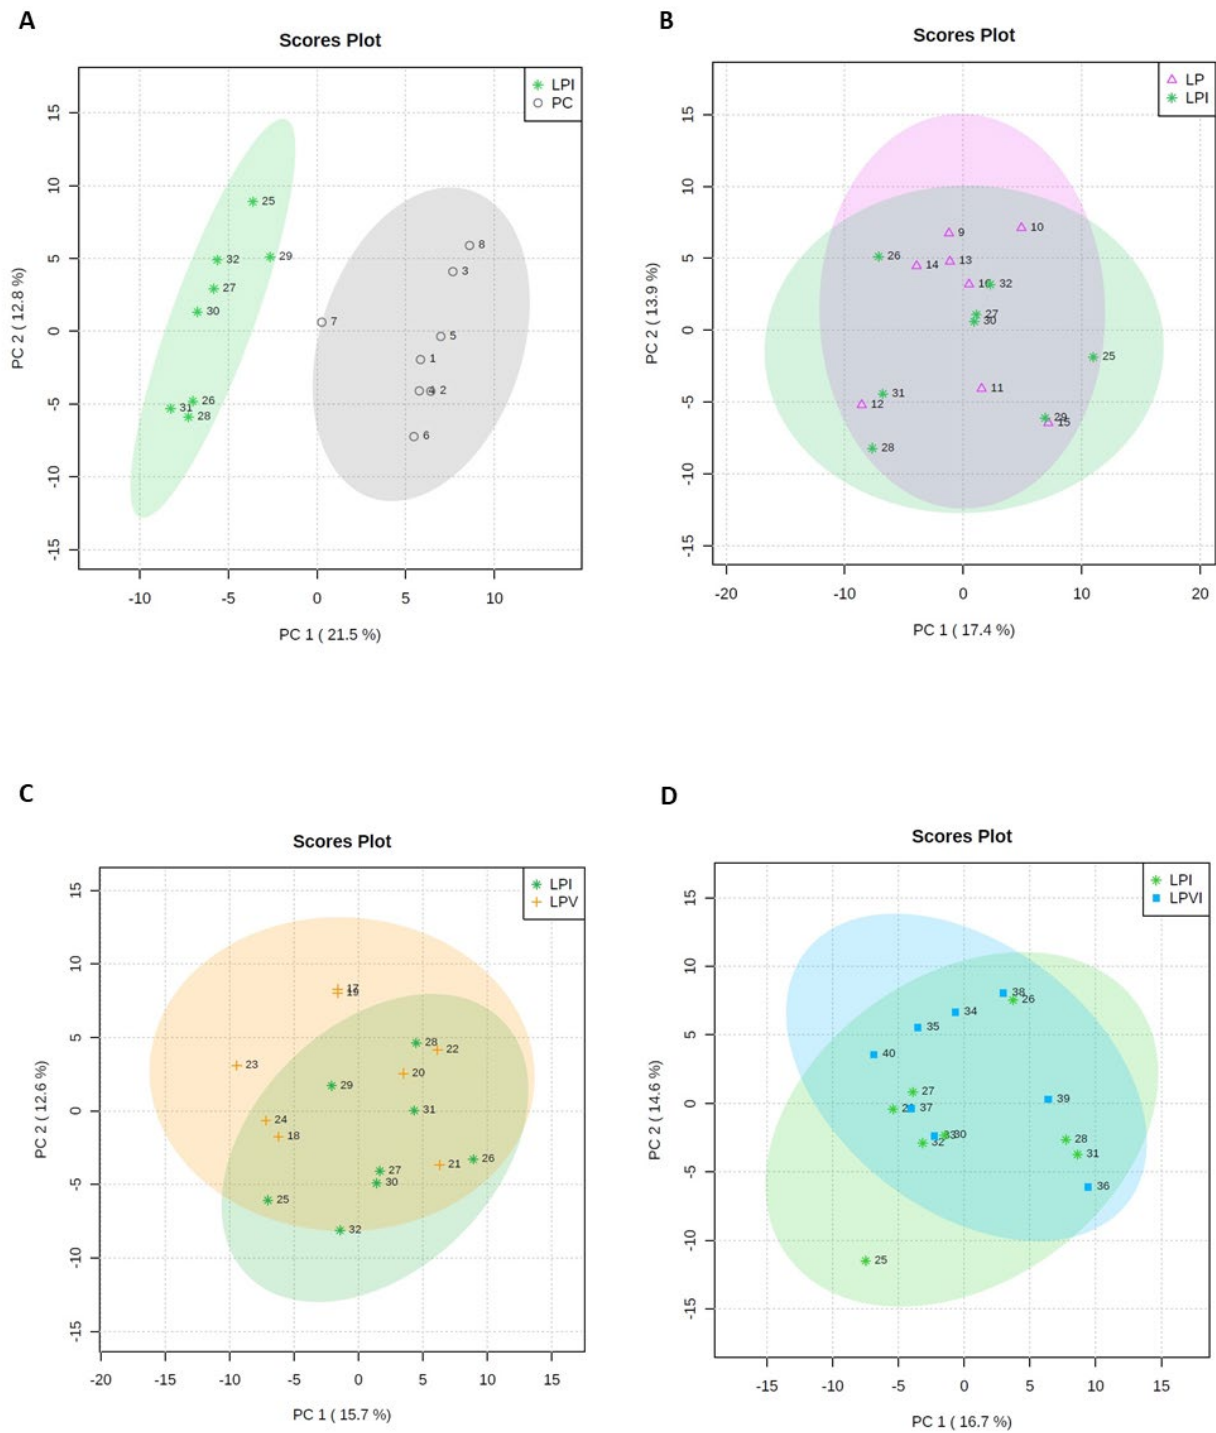

vs LP, (**C**) LPI vs LPV, (**D**) LPVI vs LPI. PC (positive control), standard protein diet; LP (negative control), low protein diet containing limiting amino acids (i.e., Lys, Met, Thr and Trp) at NRC (2012) levels; LPV, LP containing Val at NRC level; LPI: LP containing Ile at NRC level; LPVI: LP containing Val and Ile at NRC levels. Each shape represents a pig.  $n=8$ .



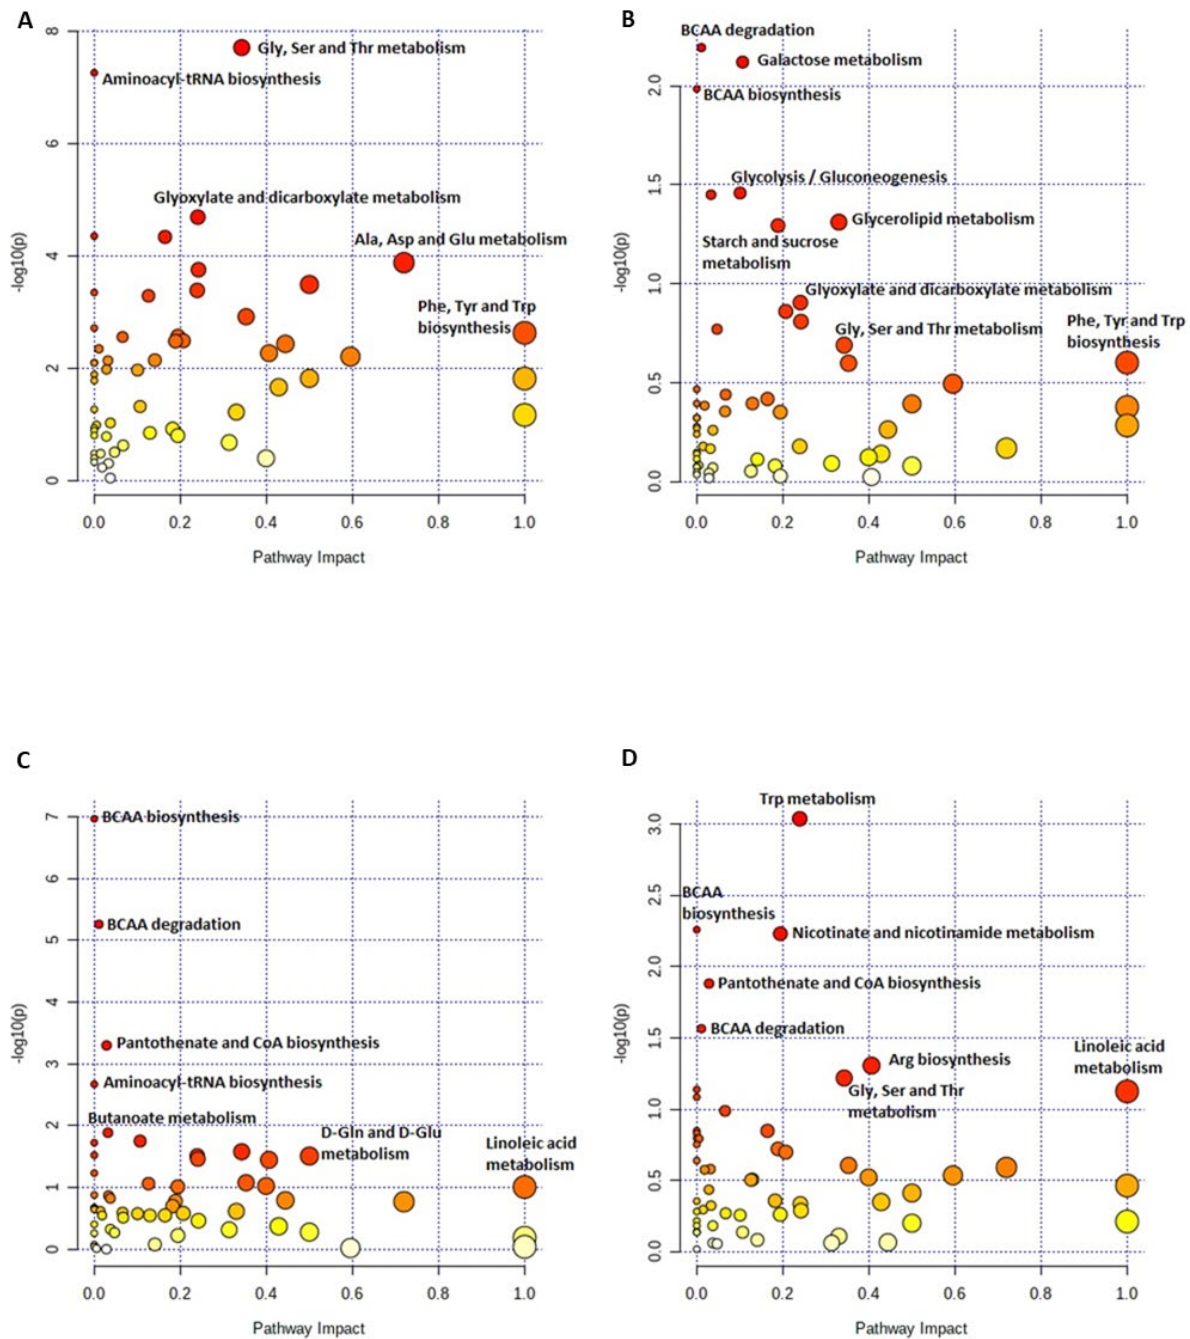

**Figure S2.** Pathway analysis map of plasma metabolites in nursery pigs fed with very low protein diets supplemented with Ile, Val, or combination of both. **(A)** LPI vs PC, **(B)** LPI vs LP, **(C)** LPI vs LPV, **(D)** LPVI vs LPI. PC (positive control), standard protein diet; LP (negative control), low protein diet containing limiting amino acids (i.e., Lys, Met, Thr and Trp) at NRC (2012) levels; LPV, LP containing Val at NRC

level; LPI: LP containing Ile at NRC level; LPVI: LP containing Val and Ile at NRC levels. Each circle is obtained from topology analysis representing a metabolic pathway with the scores. The x-axis indicates the pathway impact, and the y-axis shows the pathway enrichment. The circle size depends on its impact value while its color is based on its *P* value (i.e., greater circle size shows higher pathway impact, while darker color circles demonstrate more significant changes of metabolites and pathway enrichment).  $n=8$ .

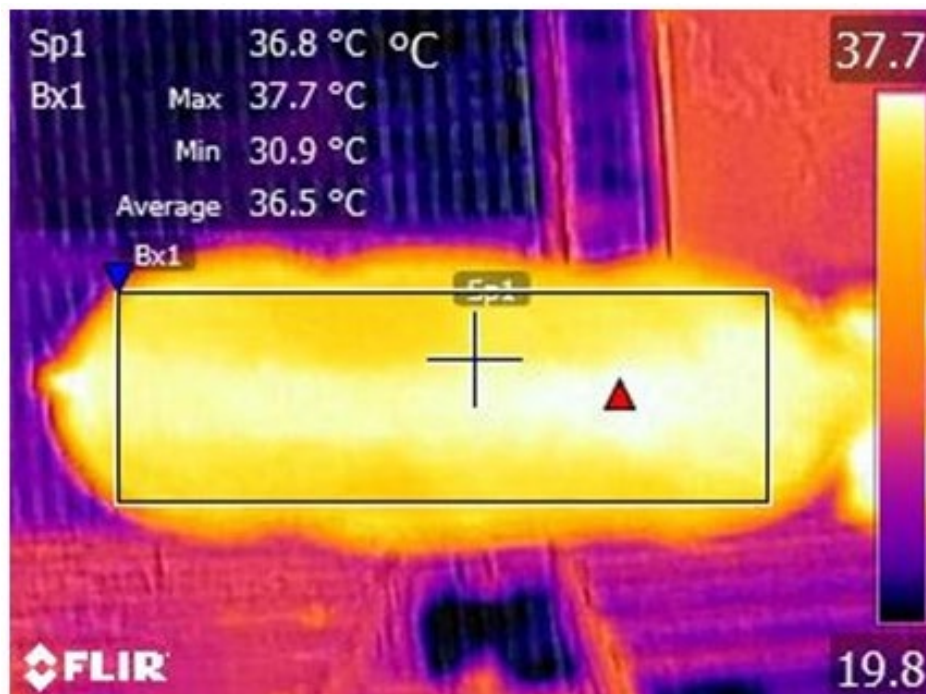

**Figure S3.** A representative picture of a thermal image. A FLIR camera software (FLIR Research Studio, Wilsonville, OR) was used to obtain the mean dorsal body surface temperature via drawing a rectangular region of interest in the back of pigs from shoulder to rump.
